# Supplementary material for: Prediction of single-cell mechanisms for disease progression in hypertrophic remodelling by a trans-omics approach
Source: PubMed Central journal article supplement (PMC8047020; doi:10.1038/s41598-021-86821-y), 2021-04-14
Supplement: 41598_2021_86821_MOESM1_ESM.pdf [file 41598_2021_86821_MOESM1_ESM.pdf]

# **Prediction of single-cell mechanisms for disease progression in hypertrophic remodelling by a transcriptomics approach**

Momoko Hamano<sup>1</sup>, Seitaro Nomura<sup>2,3</sup>, Midori Iida<sup>1</sup>, Issei Komuro<sup>2</sup>, and Yoshihiro Yamanishi<sup>1\*</sup>

<sup>1</sup>Department of Bioscience and Bioinformatics, Faculty of Computer Science and Systems Engineering,

Kyushu Institute of Technology, 680-4 Kawazu, Iizuka, Fukuoka 820-8502, Japan

<sup>2</sup>Department of Cardiovascular Medicine, Graduate School of Medicine, The University of Tokyo, Tokyo

113-8655, Japan

<sup>3</sup>Genome Science Division, Research Center for Advanced Science and Technologies, The University of

Tokyo, Tokyo 153-0041, Japan

**Supplementary data**

**Supplementary Figure 1:** The proportions of cell types in the form of cardiomyocytes with high or low

*Nppa* expression at each time point.

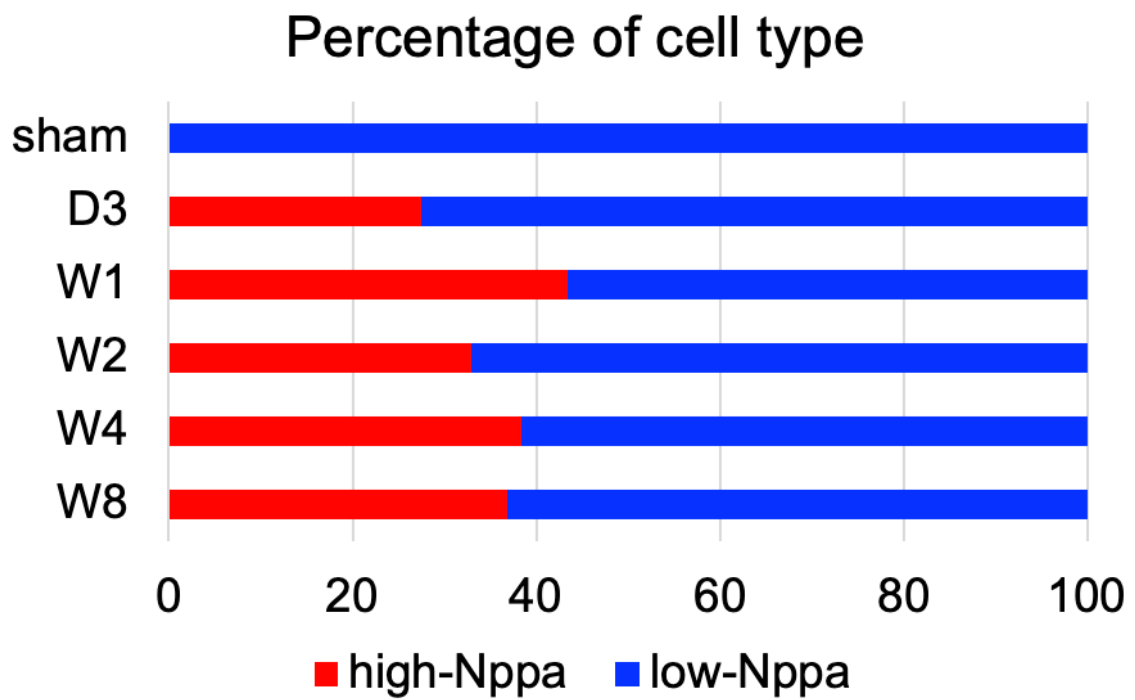

**Supplementary Figure 2:** Histological evaluation of the expression level of *NPPA* by using human

myocardium tissue.

To evaluate the expression distribution of *NPPA* by in situ hybridization (ISH), we used both sense and anti-sense probes for the *NPPA* gene. The scale bar in the figure is 50  $\mu\text{m}$ . The panels in the first row show the expression distribution of *NPPA* mRNA in healthy subjects, and the panels in the third row show the expression distribution of *NPPA* mRNA in patients with heart failure. The panels in the second row show the ISH result using the negative control probe in healthy subjects, and the panels in the fourth row show the result using the negative control probe in patients with heart failure.

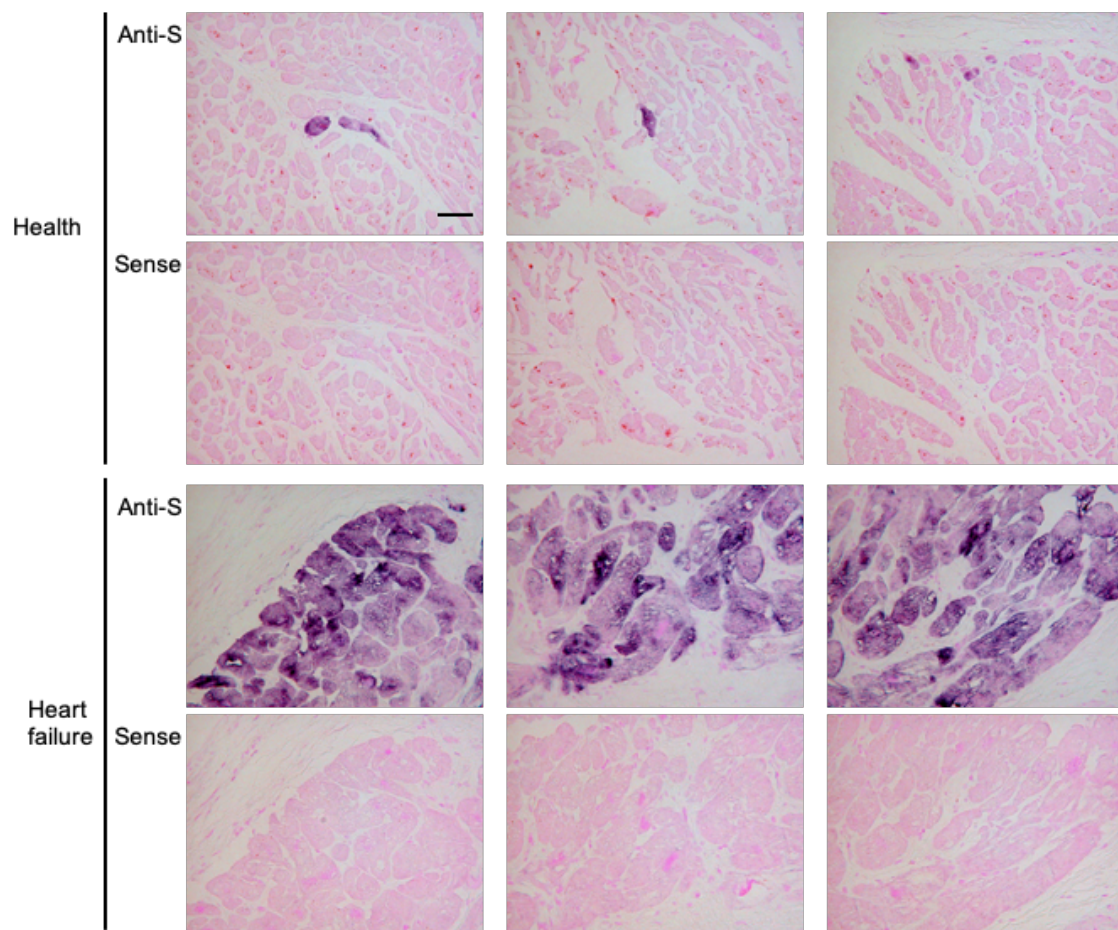

**Supplementary Figure 3:** Sequence results of Nkx2-5 binding regions in the heart of *Mus musculus*.

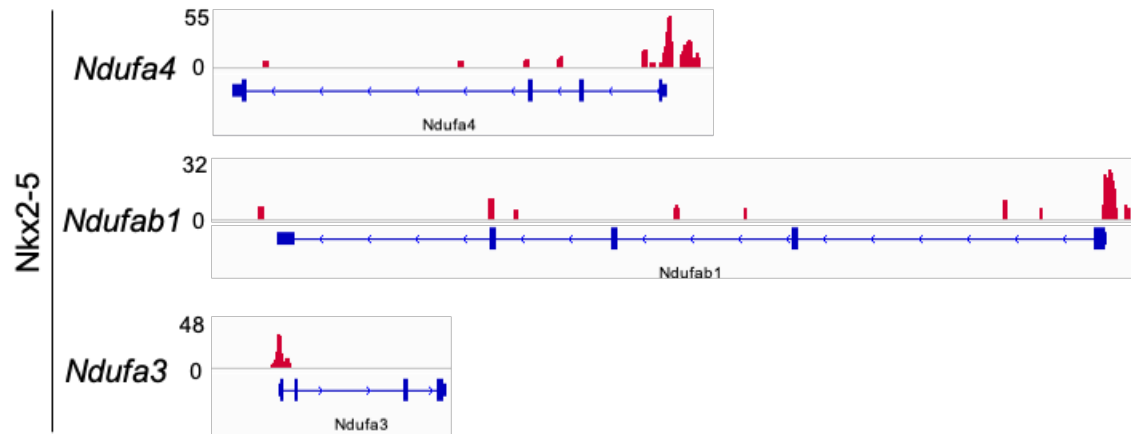

**Supplementary Figure 4:** Intracluster sum of squared error (SSE) of hierarchical clustering.

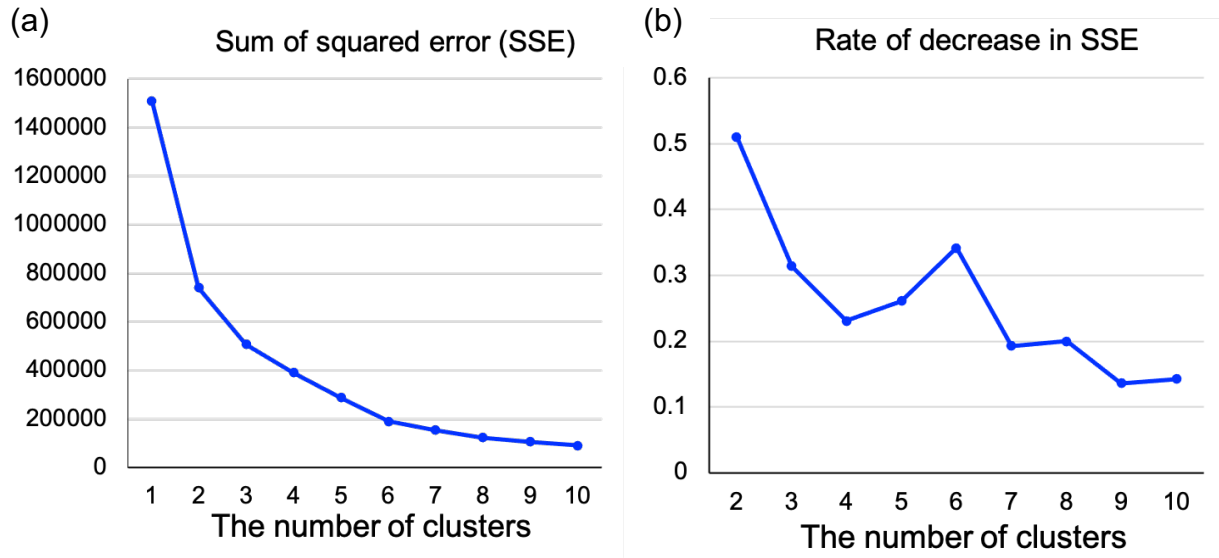

**Supplementary Table 1:** Top 10 GO terms of the 388 genes in cluster 1 from the 3,135 genes detected by ANOVA.

| GO Term                                                       | p-value    | Fold Enrichment |
|---------------------------------------------------------------|------------|-----------------|
| collagen-activated tyrosine kinase receptor signaling pathway | 2.57E-04   | 29.259          |
| cell-cell adhesion                                            | 4.05E-04   | 3.7154          |
| cell projection organization                                  | 0.00114744 | 3.8754          |
| rRNA processing                                               | 0.00143095 | 4.1798          |
| cell adhesion                                                 | 0.001724   | 2.2924          |
| positive regulation of neuron projection development          | 0.00253866 | 3.8164          |
| neuron projection development                                 | 0.00265484 | 3.7889          |
| angiogenesis                                                  | 0.00273804 | 2.9381          |
| regulation of cell growth                                     | 0.00304155 | 6.0536          |
| protein phosphorylation                                       | 0.00475838 | 2.0319          |

**Supplementary Table 2:** Top 10 GO terms of significantly expressed genes in cardiomyocytes with high

*Nppa* expression compared with those with low *Nppa* expression at 3 days and 1, 2, 4 and 8 weeks after

TAC.

3 days

| NAME                                                                      | NES    | NOM p-val |
|---------------------------------------------------------------------------|--------|-----------|
| GO_POSITIVE_REGULATION_OF_DENDRITIC_SPINE_DEVELOPMENT                     | 1.7519 | 0.00000   |
| GO_REGULATION_OF_NATURAL_KILLER_CELL_ACTIVATION                           | 1.7225 | 0.01058   |
| GO_POSITIVE_REGULATION_OF_AMINE_TRANSPORT                                 | 1.6831 | 0.01443   |
| GO_REGULATION_OF GRANULOCYTE_CHEMOTAXIS                                   | 1.6650 | 0.00533   |
| GO_NEGATIVE_REGULATION_OF_CYCLIC_NUCLEOTIDE_METABOLIC_PROCESS             | 1.6614 | 0.00344   |
| GO_NEGATIVE_REGULATION_OF_BIOMINERAL_TISSUE_DEVELOPMENT                   | 1.6545 | 0.00528   |
| GO_REGULATION_OF_TRANSCRIPTION_ELONGATION_FROM_RNA_POLYMERASE_II_PROMOTER | 1.6477 | 0.01015   |
| GO_HIPPO_SIGNALING                                                        | 1.6374 | 0.00738   |
| GO_DNA_PACKAGING                                                          | 1.6364 | 0.00000   |

1 weeks

| NAME                                                                      | NES    | NOM p-val |
|---------------------------------------------------------------------------|--------|-----------|
| GO_REGULATION_OF_PHOSPHATIDYLINOSITOL_3_KINASE_ACTIVITY                   | 1.7218 | 0.00409   |
| GO_REGULATION_OF_METANEPHROS_DEVELOPMENT                                  | 1.6886 | 0.00000   |
| GO_POSITIVE_REGULATION_OF_POTASSIUM_ION_TRANSMEMBRANE_TRANSPORT           | 1.6583 | 0.01299   |
| GO_STEROL_TRANSPORT                                                       | 1.6404 | 0.00349   |
| GO_REGULATION_OF_POTASSIUM_ION_TRANSMEMBRANE_TRANSPORT                    | 1.6359 | 0.00383   |
| GO_BILE_ACID_AND_BILE_SALT_TRANSPORT                                      | 1.6324 | 0.00375   |
| GO_DETECTION_OF_MECHANICAL_STIMULUS_INVOLVED_IN_SENSORY_PERCEPTION        | 1.6312 | 0.02053   |
| GO_REGULATION_OF_RESPONSE_TO_INTERFERON_GAMMA                             | 1.6221 | 0.01357   |
| GO_POSITIVE_REGULATION_OF_CALCIIUM_ION_TRANSMEMBRANE_TRANSPORTER_ACTIVITY | 1.6047 | 0.01927   |
| GO_ANION_HOMEOSTASIS                                                      | 1.5985 | 0.01394   |

2 weeks

| NAME                                                               | NES    | NOM p-val |
|--------------------------------------------------------------------|--------|-----------|
| GO_NEGATIVE_REGULATION_OF_LYASE_ACTIVITY                           | 1.7194 | 0.00624   |
| GO_NEGATIVE_REGULATION_OF_CYCLIC_NUCLEOTIDE_METABOLIC_PROCESS      | 1.7157 | 0.00714   |
| GO_REGULATION_OF_SYNAPTIC_TRANSMISSION_GLUTAMATERGIC               | 1.6992 | 0.00000   |
| GO_REGULATION_OF_GASTRULATION                                      | 1.6509 | 0.00880   |
| GO_PROTEIN_EXIT_FROM_ENDOPLASMIC_RETICULUM                         | 1.5651 | 0.02194   |
| GO_Glutamine_METABOLIC_PROCESS                                     | 1.5606 | 0.02157   |
| GO_MOTOR_NEURON_AXON_GUIDANCE                                      | 1.5481 | 0.02935   |
| GO_ACTIN_MYOSIN_FILAMENT_SLIDING                                   | 1.5480 | 0.02773   |
| GO_HOMOPHILIC_CELL_ADHESION_VIA_PLASMA_MEMBRANE_ADHESION_MOLECULES | 1.5216 | 0.00000   |
| GO_MAGNESIUM_ION_TRANSMEMBRANE_TRANSPORT                           | 1.5124 | 0.02030   |

4 weeks

| NAME                                                  | NES    | NOM p-val |
|-------------------------------------------------------|--------|-----------|
| GO_DNA_STRAND_ELONGATION_INVOLVED_IN_DNA_REPLICATION  | 1.7400 | 0.00176   |
| GO_GASTRULATION_WITH_MOUTH_FORMING_SECOND             | 1.7095 | 0.00171   |
| GO_POSITIVE_REGULATION_OF_PROTEIN_EXPORT_FROM_NUCLEUS | 1.6979 | 0.01207   |
| GO_ZINC_ION_HOMEOSTASIS                               | 1.6921 | 0.00570   |
| GO_CELL_SUBSTRATE_JUNCTION_ASSEMBLY                   | 1.6880 | 0.00382   |
| GO_EMBRYONIC_AXIS_SPECIFICATION                       | 1.6590 | 0.00368   |
| GO_ENTEROENDOCRINE_CELL_DIFFERENTIATION               | 1.6521 | 0.00906   |
| GO_REGULATION_OF_SPROUTING_ANGIOGENESIS               | 1.6472 | 0.00570   |
| GO_RETINA_LAYER_FORMATION                             | 1.6439 | 0.00954   |
| GO_ODONTOGENESIS_OF_DENTIN_CONTAINING_TOOTH           | 1.6388 | 0.00174   |

8 weeks

| NAME                                                        | NES    | NOM p-val |
|-------------------------------------------------------------|--------|-----------|
| GO_EPIBOLY                                                  | 1.6586 | 0.00753   |
| GO_SYNAPTIC_TRANSMISSION_GLUTAMATERGIC                      | 1.6246 | 0.00745   |
| GO_NEGATIVE_REGULATION_OF_LYMPHOCYTE_DIFFERENTIATION        | 1.6037 | 0.01601   |
| GO_CRANIAL_NERVE_DEVELOPMENT                                | 1.5976 | 0.01919   |
| GO_PEPTIDYL_Glutamic_ACID_MODIFICATION                      | 1.5829 | 0.00874   |
| GO_POSITIVE_REGULATION_OF_ACTIN_CYTOSKELETON_REORGANIZATION | 1.5799 | 0.02348   |
| GO_REGULATION_OF_OSTEOBLAST_PROLIFERATION                   | 1.5540 | 0.01587   |
| GO_REGULATION_OF_NON_CANONICAL_WNT_SIGNALING_PATHWAY        | 1.5381 | 0.01533   |
| GO_REGULATION_OF_MEIOTIC_NUCLEAR_DIVISION                   | 1.5140 | 0.02564   |
| GO_RESPONSE_TO_PLATELET_DERIVED_GROWTH_FACTOR               | 1.5133 | 0.02368   |
